# Supplementary material for: Metagenomic Insights into the Uncultured Diversity and Physiology of Microbes in Four Hypersaline Soda Lake Brines
Source: PubMed Central journal article supplement (PMC4766312; doi:10.3389/fmicb.2016.00211), 2016-02-25
Supplement: DataSheet1.pdf [file DataSheet1.pdf]

*Supplementary Material*

**Metagenomic insights into the uncultured diversity and physiology of microbes in four hypersaline soda lake brines**

**Charlotte D. Vavourakis, Rohit Ghai, Francisco Rodriguez-Valera, Dmitry Y. Sorokin, Susannah G. Tringe, Philip Hugenholtz, Gerard Muyzer\***

\* **Correspondence:** Gerard Muyzer: [g.muijzer@uva.nl](mailto:g.muijzer@uva.nl)

## 1 Supplementary Figures

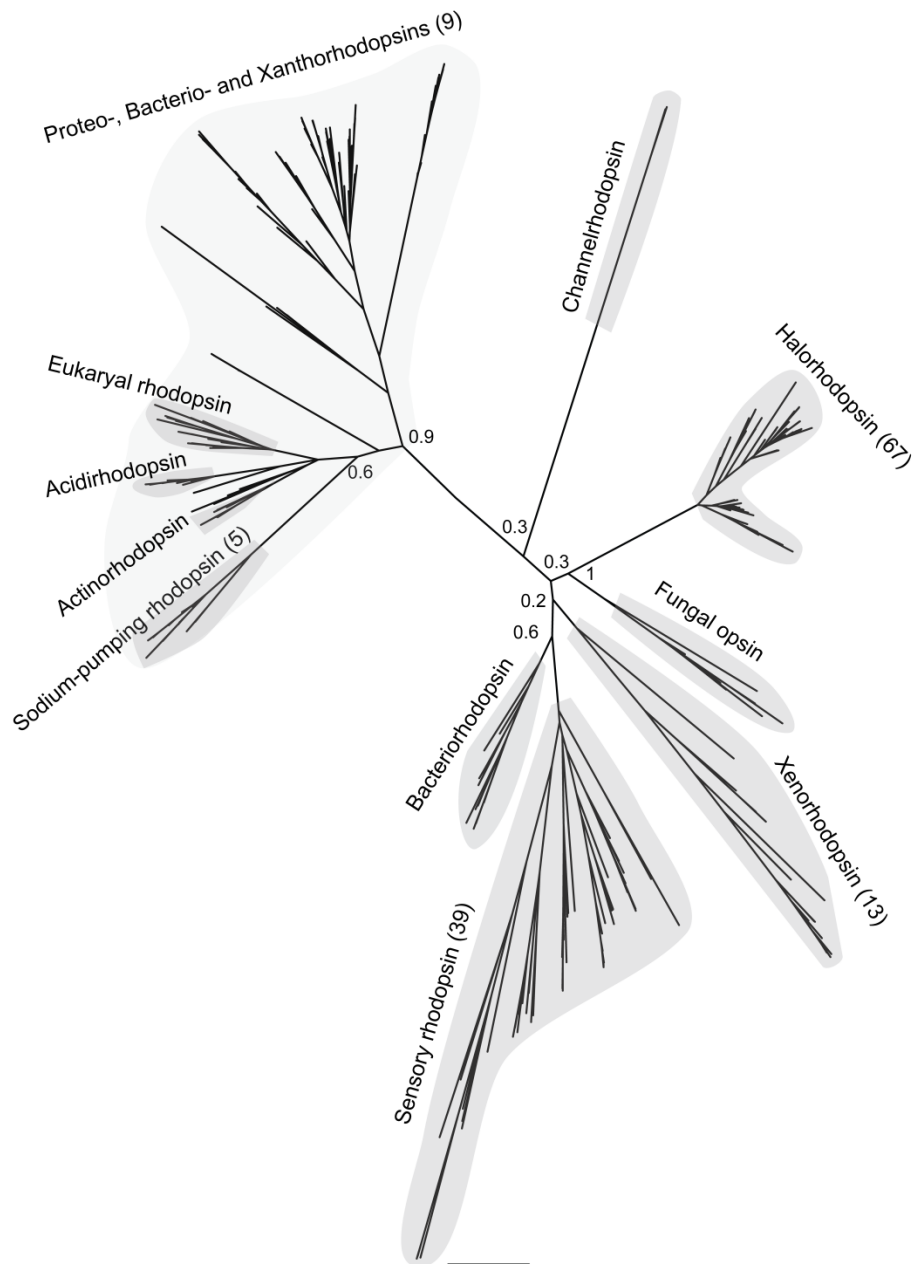

**Supplementary Figure 1.** Maximum-likelihood tree of rhodopsins found on the >5kb contigs from the soda brine datasets and reference protein sequences. The number of rhodopsins found in the soda brine datasets within a certain functional group is given between brackets. Putative rhodopsins from viral reference genomes were pruned from the tree. Scale bar indicates 9% sequence difference. Selected bootstraps values (100x) are shown at the nodes.

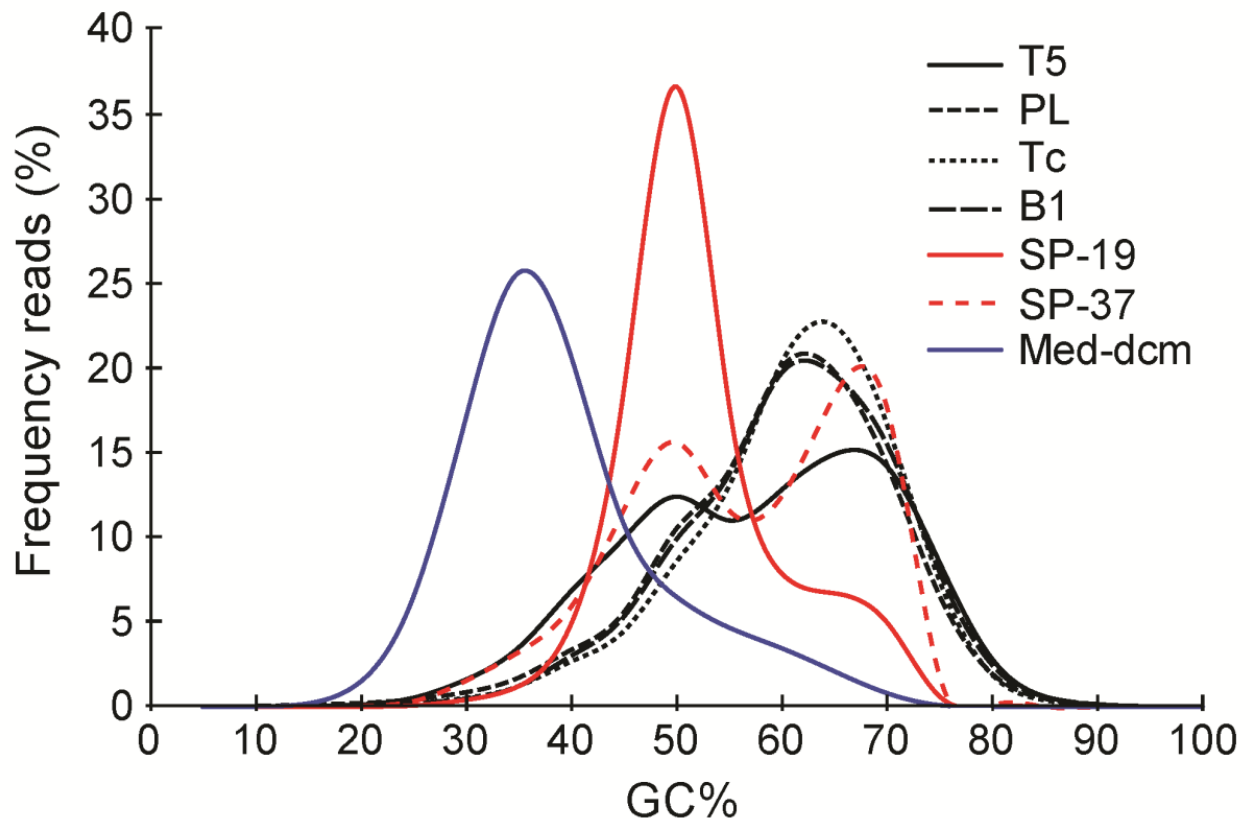

**Supplementary Figure 2.** Relative frequency of GC% of a subsample of 1 million sequence reads from the Kulunda soda brines (Tanatar-5 (T5, Salinity S=17%), Picturesque Lake (PL, S=25%), Tanatar trona crystallizer (Tc, S=30%) and Bitter-1 (B1, S=40%) calculated in intervals of bin width 5 and compared to the GC% distribution of three metagenomes obtained by 454 pyrosequencing from saline environments with neutral pH; a crystallizer pond (SP-37, S=37%) and an intermediate saline pond (SP-19, S=19%) of the solar saltern in Santa Pola, Spain (Ghai *et al.*, 2011) and the deep chlorophyll maximum in the Mediterranean Sea near Alicante, Spain (Med-dcm, 3.8% salinity; Ghai *et al.*, 2010). The large peak in the GC-profile of SP-37 was attributed to the predominance of the square archaeon *Haloquadratum walsbyi* that has a low average GC-content compared to other members of the *Halobacteria*, such as those that dominate in the hypersaline soda brines.

Additional reference:

Ghai, R., Martin-Cuadrado, A., Molto, A.G., Heredia, I.G., Cabrera, R., Martin, J., *et al.* (2010). Metagenome of the Mediterranean deep chlorophyll maximum studied by direct and fosmid library 454 pyrosequencing. *ISME J.* 4, 1154-1166. doi:10.1038/ismej.2010.44

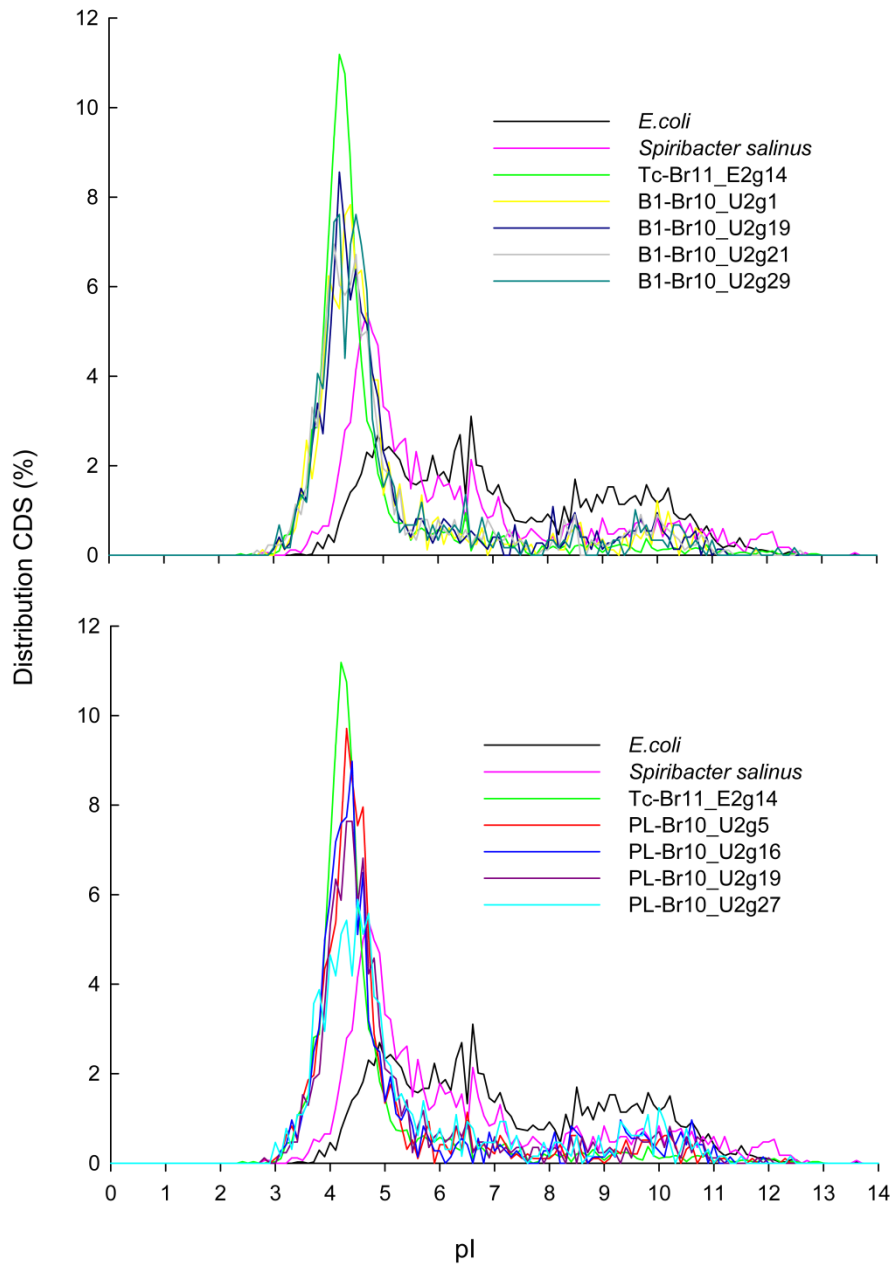

**Supplementary Figure 3. Predicted isoelectric points (pI) for the coding sequences (CDS) of the *Nanohaloarchaea* draft genomes demonstrating the effect of the ‘salt-in’ strategy for osmotic adaptation on their protein composition. The pI profiles of *E. coli* (‘salt-out’), Tc-Br11\_E2g14 (family *Natrialbaceae*, archaeal ‘salt-in’) and *Spiribacter salinus* (bacterial ‘salt-in’/mixed strategy) are plotted for comparison.**

## 2 Supplementary Tables

**Supplementary Table 1. Metagenomics contigs >5kb binned to top level taxa.** Metagenomes of the brines of Lake Tanatar 5 (T5-Br10), Picturesque Lake (PL-Br10), Tanatar crystalizer (Tc-Br11) and Lake Bitter 1 (B1-Br10).

|                                             | <b>T5-Br10</b> | <b>PL-Br10</b> | <b>Tc-Br11</b> | <b>B1-Br10</b> |
|---------------------------------------------|----------------|----------------|----------------|----------------|
| <i>Acidobacteria</i>                        | 8              | 3              | 1              | 4              |
| <i>Actinobacteria</i>                       | 1304           | 430            | 27             | 176            |
| <i>Alphaproteobacteria</i>                  | 2530           | 488            | 40             | 269            |
| <i>Aquificae</i>                            | 0              | 1              | 0              | 0              |
| <i>Bacteroidetes</i>                        | 546            | 349            | 256            | 11             |
| <i>Betaproteobacteria</i>                   | 113            | 61             | 13             | 36             |
| <i>Caldiserica</i>                          | 0              | 0              | 1              | 0              |
| <i>Chloroflexi</i>                          | 13             | 10             | 4              | 3              |
| <i>Chrysiogenetes</i>                       | 2              | 0              | 0              | 0              |
| <i>Crenarchaeota</i>                        | 2              | 7              | 5              | 5              |
| <i>Cyanobacteria</i>                        | 65             | 36             | 13             | 18             |
| <i>Deferribacteres</i>                      | 2              | 0              | 0              | 1              |
| <i>Deinococcus-Thermus</i>                  | 10             | 7              | 1              | 6              |
| <i>Deltaproteobacteria</i>                  | 118            | 258            | 185            | 23             |
| <i>Dictyoglomi</i>                          | 0              | 0              | 0              | 1              |
| <i>Epsilonproteobacteria</i>                | 8              | 2              | 1              | 2              |
| <i>Eukaryota</i>                            | 8963           | 7763           | 41             | 6811           |
| <i>Euryarchaeota</i>                        | 222            | 10152          | 6442           | 4931           |
| <i>Firmicutes</i>                           | 211            | 907            | 788            | 389            |
| <i>Fusobacteria</i>                         | 1              | 2              | 1              | 1              |
| <i>Gammaproteobacteria</i>                  | 2246           | 1335           | 393            | 436            |
| <i>Gemmatimonadetes</i>                     | 56             | 7              | 2              | 0              |
| <i>Nanoarchaeota</i>                        | 0              | 1              | 0              | 1              |
| <i>Nitrospirae</i>                          | 1              | 1              | 1              | 1              |
| <i>Planctomycetes</i>                       | 16             | 5              | 5              | 3              |
| <i>Spirochaetes</i>                         | 11             | 7              | 2              | 34             |
| <i>Synergistetes</i>                        | 0              | 6              | 1              | 0              |
| <i>Tenericutes</i>                          | 149            | 3              | 1              | 49             |
| <i>Thaumarchaeota</i>                       | 0              | 6              | 4              | 4              |
| <i>Thermodesulfobacteria</i>                | 1              | 0              | 0              | 0              |
| <i>Thermotogae</i>                          | 1              | 3              | 2              | 2              |
| <i>Unclassified (incl. Nanohaloarchaea)</i> | 2028           | 2685           | 896            | 2023           |
| <i>Verrucomicrobia</i>                      | 326            | 6              | 3              | 4              |
| <i>Viruses</i>                              | 203            | 168            | 68             | 101            |
| Discarded                                   | 194            | 389            | 229            | 206            |
| <b>Total &gt;5kb contigs</b>                | <b>19350</b>   | <b>25098</b>   | <b>9426</b>    | <b>15551</b>   |

**Supplementary Table 2. GenBank Accession numbers of the selected reconstructed draft genomes discussed in this paper.**

| Name <Id>                                       | GenBank Accession |
|-------------------------------------------------|-------------------|
| <i>Chitinophagaceae bacterium</i> T5-Br10_B2g13 | LKNA00000000      |
| <i>Flavobacteriaceae bacterium</i> T5-Br10_B2g0 | LKMZ00000000      |
| <i>Rhodothermaceae bacterium</i> Tc-Br11_B2g6_7 | LKNB00000000      |
| <i>Halobacteriaceae archaeon</i> Tc-Br11_E2g27  | LKNH00000000      |
| <i>Haloferacaceae archaeon</i> PL-Br10_E2g46    | LKMT00000000      |
| <i>Haloferacaceae archaeon</i> B1-Br10_E2g22    | LKML00000000      |
| <i>Haloferacaceae archaeon</i> PL-Br10_E2g29    | LKMS00000000      |
| <i>Halorubrum</i> sp. PL-Br10_E2g5              | LKMU00000000      |
| <i>Haloferacaceae archaeon</i> Tc-Br11_E2g18    | LKNE00000000      |
| <i>Nanohaloarchaea archaeon</i> B1-Br10_U2g1    | LKMN00000000      |
| <i>Nanohaloarchaea archaeon</i> B1-Br10_U2g21   | LKMP00000000      |
| <i>Nanohaloarchaea archaeon</i> B1-Br10_U2g19   | LKMO00000000      |
| <i>Nanohaloarchaea archaeon</i> B1-Br10_U2g29   | LKMQ00000000      |
| <i>Nanohaloarchaea archaeon</i> PL-Br10_U2g5    | LKMY00000000      |
| <i>Nanohaloarchaea archaeon</i> PL-Br10_U2g19   | LKMW00000000      |
| <i>Nanohaloarchaea archaeon</i> PL-Br10_U2g16   | LKMV00000000      |
| <i>Nanohaloarchaea archaeon</i> PL-Br10_U2g27   | LKMX00000000      |
| <i>Natrialbaceae archaeon</i> B1-Br10_E2g2      | LKMK00000000      |
| <i>Natrialbaceae archaeon</i> B1-Br10_E2g27     | LKMM00000000      |
| <i>Natrialbaceae archaeon</i> Tc-Br11_E2g1      | LKNC00000000      |
| <i>Natrialbaceae archaeon</i> Tc-Br11_E2g14     | LKND00000000      |
| <i>Natrialbaceae archaeon</i> Tc-Br11_E2g28     | LKNF00000000      |
| <i>Natrialbaceae archaeon</i> Tc-Br11_E2g8      | LKNG00000000      |
| <i>Natrialbaceae archaeon</i> PL-Br10_E2g26     | LKMR00000000      |

**Supplementary Table 3. Total richness of top level taxa and OTUs detected in the metagenomic and amplicon datasets from four different soda lake brines.** Lake Bitter 1 (B1; Salinity S = 400 g/L), Tanatar crystalizer (Tc; S = 300g/L), Picturesque Lake (PL; S = 250g/L) and Lake Tanatar 5 (T5; S = 170 g/L). # = total number of.

|                                         | B1-Br10 | Tc-Br11 | PL-Br10 | T5-Br10 |
|-----------------------------------------|---------|---------|---------|---------|
| Metagenomes - # top level taxa          | 6       | 9       | 10      | 14      |
| Amplicon sequences - # top level taxa   | 12      | 13      | 19      | 11      |
| Amplicon sequences - # genus level OTUs | 47      | 46      | 102     | 34      |

**Supplementary Table 4. Average nucleotide identity (ANI) matrix of the *Nanohaloarchaea*-related draft (1-4, 9-12) and reference (5-8) genomes.**

|                                                 | (1)  | (2)  | (3)  | (4)  | (5)  | (6)  | (7)  | (8)  | (9)  | (10) | (11) | (12) |
|-------------------------------------------------|------|------|------|------|------|------|------|------|------|------|------|------|
| B1-Br10_U2g1 (1)                                | 100  |      |      |      |      |      |      |      |      |      |      |      |
| B1-Br10_U2g19 (2)                               | 74.2 | 100  |      |      |      |      |      |      |      |      |      |      |
| B1-Br10_U2g21 (3)                               | 66.8 | 67.2 | 100  |      |      |      |      |      |      |      |      |      |
| B1-Br10_U2g29 (4)                               | 67.0 | 67.1 | 69.0 | 100  |      |      |      |      |      |      |      |      |
| <i>Candidatus</i> Haloredivivus sp G17' (5)     | 66.9 | 67.4 | 68.6 | 71.9 | 100  |      |      |      |      |      |      |      |
| <i>Candidatus</i> Nanosalina sp J07AB43' (6)    | 66.3 | 66.3 | 65.9 | 66.8 | 66.7 | 100  |      |      |      |      |      |      |
| <i>Candidatus</i> Nanosalinarum sp J07AB56' (7) | 63.9 | 64.1 | 62.8 | 63.3 | 64.3 | 64.6 | 100  |      |      |      |      |      |
| <i>Nanohaloarchaea archaeon</i> AB578-D14 (8)   | 63.3 | 63.6 | 61.6 | 63.1 | 65.0 | 64.6 | 81.1 | 100  |      |      |      |      |
| PL-Br10_U2g16 (9)                               | 67.8 | 68.0 | 66.0 | 66.6 | 67.3 | 66.2 | 64.0 | 62.4 | 100  |      |      |      |
| PL-Br10_U2g19 (10)                              | 99.4 | 74.5 | 66.7 | 66.8 | 67.1 | 66.3 | 64.2 | 63.4 | 68.0 | 100  |      |      |
| PL-Br10_U2g27 (11)                              | 67.0 | 67.6 | 74.8 | 69.2 | 70.1 | 66.1 | 64.0 | 63.4 | 66.3 | 67.1 | 100  |      |
| PL-Br10_U2g5 (12)                               | 66.8 | 67.3 | 68.7 | 74.9 | 73.5 | 66.3 | 63.5 | 62.2 | 66.2 | 66.7 | 69.2 | 100  |

**Supplementary Table 5. ANI matrix of the *Natrialbaceae*-related draft (1-2, 7-11) and reference (3-6) genomes.**

|                                          | (1)  | (2)  | (3)  | (4)  | (5)  | (6)  | (7)  | (8)  | (9)  | (10) | (11) |
|------------------------------------------|------|------|------|------|------|------|------|------|------|------|------|
| B1-Br10_E2g2 (1)                         | 100  |      |      |      |      |      |      |      |      |      |      |
| B1-Br10_E2g27 (2)                        | 76.5 | 100  |      |      |      |      |      |      |      |      |      |
| <i>Halovivax ruber</i> XH 70 (3)         | 74.1 | 71.4 | 100  |      |      |      |      |      |      |      |      |
| <i>Natrialba magadii</i> (4)             | 77.3 | 75.1 | 73.9 | 100  |      |      |      |      |      |      |      |
| <i>Natronobacterium gregoryi</i> SP2 (5) | 77.2 | 74.3 | 73.7 | 77.4 | 100  |      |      |      |      |      |      |
| <i>Natronococcus occultus</i> SP4 (6)    | 77.5 | 74.4 | 74.1 | 77.3 | 77.1 | 100  |      |      |      |      |      |
| PL-Br10_E2g26 (7)                        | 73.7 | 72.5 | 72.4 | 73.9 | 73.2 | 73.3 | 100  |      |      |      |      |
| Tc-Br11_E2g1 (8)                         | 76.3 | 73.8 | 73.8 | 75.6 | 75.2 | 75.9 | 73.6 | 100  |      |      |      |
| Tc-Br11_E2g14 (9)                        | 74.7 | 72.9 | 73.2 | 74.5 | 74.1 | 74.7 | 76.2 | 74.4 | 100  |      |      |
| Tc-Br11_E2g28 (10)                       | 73.5 | 72.2 | 72.1 | 73.7 | 73.1 | 72.9 | 98.6 | 73.5 | 76.1 | 100  |      |
| Tc-Br11_E2g8 (11)                        | 76.0 | 73.1 | 73.4 | 74.6 | 74.6 | 75.5 | 73.6 | 76.1 | 74.5 | 73.1 | 100  |

**Supplementary Table 6. ANI matrix of the *Haloferacaceae*-related draft (1, 4-7) and reference (2-3) genomes.**

|                                                | (1)  | (2)  | (3)  | (4)  | (5)  | (6)  | (7) |
|------------------------------------------------|------|------|------|------|------|------|-----|
| B1-Br10_E2g22 (1)                              | 100  |      |      |      |      |      |     |
| <i>Halonotius pteroides</i> (2)                | 72.7 | 100  |      |      |      |      |     |
| <i>Halorubrum lacusprofundi</i> ATCC 49239 (3) | 70.0 | 72.0 | 100  |      |      |      |     |
| PL-Br10_E2g29 (4)                              | 74.8 | 74.6 | 71.6 | 100  |      |      |     |
| PL-Br10_E2g46 (5)                              | 68.7 | 68.8 | 68.3 | 69.9 | 100  |      |     |
| PL-Br10_E2g5 (6)                               | 69.5 | 71.2 | 80.6 | 71.6 | 68.4 | 100  |     |
| Tc-Br11_E2g18 (7)                              | 69.4 | 70.9 | 76.9 | 71.6 | 68.7 | 76.4 | 100 |

**Supplementary Table 7. ANI matrix of the *Halobacteriaceae*-related draft (4) and reference (1-3) genomes.**

|                                              | (1)  | (2)  | (3)  | (4) |
|----------------------------------------------|------|------|------|-----|
| <i>Halomicrobium mukohataei</i> DSM12286 (1) | 100  |      |      |     |
| <i>Halorhabdus tiamatea</i> SARLAB (2)       | 73.0 | 100  |      |     |
| <i>Halorhabdus utahensis</i> DSM 12940 (3)   | 72.4 | 83.9 | 100  |     |
| Tc-Br11_E2g27 (4)                            | 68.7 | 68.1 | 68.0 | 100 |

**Supplementary Table 8. ANI matrix of the *Bacteroidetes*-related draft (11-13, 1-10) and reference (3-6) genomes.**

|                                               | (1)  | (2)  | (3)  | (4)  | (5)  | (6)  | (7)  | (8)  | (9)  | (10) | (11) | (12) | (13) |
|-----------------------------------------------|------|------|------|------|------|------|------|------|------|------|------|------|------|
| <i>Balneola vulgaris</i> DSM 17893 (1)        | 100  |      |      |      |      |      |      |      |      |      |      |      |      |
| <i>Gracilimonas tropica</i> DSM 19535 (2)     | 67.3 | 100  |      |      |      |      |      |      |      |      |      |      |      |
| <i>Gramella forsetii</i> KT0803 (3)           | 63.2 | 62.8 | 100  |      |      |      |      |      |      |      |      |      |      |
| <i>Psychroflexus gondwanensis</i> ACAM 44 (4) | 62.9 | 62.4 | 66.9 | 100  |      |      |      |      |      |      |      |      |      |
| <i>Psychroflexus tropicus</i> DSM 15496 (5)   | 62.4 | 62.0 | 67.0 | 73.6 | 100  |      |      |      |      |      |      |      |      |
| <i>Rhodothermus marinus</i> DSM 4252 (6)      | 61.7 | 62.0 | 61.0 | 61.0 | 59.9 | 100  |      |      |      |      |      |      |      |
| <i>Rhodothermus marinus</i> SG0.5JP17 172 (7) | 61.8 | 61.9 | 60.8 | 60.9 | 60.0 | 95.0 | 100  |      |      |      |      |      |      |
| <i>Salinibacter ruber</i> DSM 13855 (8)       | 61.6 | 61.3 | 61.9 | 61.7 | 59.6 | 67.8 | 67.8 | 100  |      |      |      |      |      |
| <i>Salinibacter ruber</i> M8 (9)              | 61.4 | 61.5 | 61.0 | 60.9 | 59.1 | 67.8 | 67.8 | 98.5 | 100  |      |      |      |      |
| <i>Salisaeta longa</i> DSM 21114 (10)         | 62.1 | 61.7 | 60.6 | 61.0 | 60.0 | 67.8 | 67.8 | 69.9 | 69.8 | 100  |      |      |      |
| T5-Br10_B2g0 (11)                             | 62.4 | 61.7 | 67.0 | 68.4 | 68.2 | 59.0 | 58.9 | 57.2 | 56.8 | 58.0 | 100  |      |      |
| T5-Br10_B2g13 (12)                            | 65.2 | 66.2 | 61.6 | 61.7 | 61.5 | 61.6 | 61.7 | 61.2 | 61.3 | 61.4 | 61.3 | 100  |      |
| Tc-Br11_B2g6_7 (13)                           | 61.9 | 62.3 | 60.7 | 60.9 | 59.5 | 67.6 | 67.6 | 67.1 | 67.2 | 67.4 | 58.8 | 62.1 | 100  |



**Supplementary Table 9. Functional classification of rhodopsin sequences found in the reconstructed draft genomes as derived from the phylogenetic protein tree shown in Supplementary Figure 1**

| <b>Taxon</b>            | <b>Draft ID</b>      | <b>Sequence ID</b>    | <b>Functional classification</b> |
|-------------------------|----------------------|-----------------------|----------------------------------|
| <i>Bacteroidetes</i>    | T5-Br10_B2g0         | LT5-BRINE-C1367-cds1  | sodium-pumping proteorhodopsin   |
|                         | T5-Br10_B2g0         | LT5-BRINE-C2167-cds1  | proteorhodopsin                  |
|                         | T5-Br10_B2g13        | LT5-BRINE-C29-cds9    | sodium-pumping proteorhodopsin   |
| <i>Nanohaloarchaea</i>  | B1-Br10_U2g21        | LB-BRINE-C50-cds41    | xenorhodopsin                    |
|                         | B1-Br10_U2g19        | LB-BRINE-C34-cds1     | xenorhodopsin                    |
|                         | B1-Br10_U2g29        | LB-BRINE-C1247-cds2   | xenorhodopsin                    |
|                         | PL-Br10_U2g19        | PL-BRINE-C3753-cds9   | xenorhodopsin                    |
|                         | PL-Br10_U2g16        | PL-BRINE-C117-cds14   | xenorhodopsin                    |
|                         | PL-Br10_U2g27        | PL-BRINE-C793-cds5    | xenorhodopsin                    |
| <i>Natrialbaceae</i>    | B1-Br10_E2g2         | LB-BRINE-C355-cds25   | halorhodopsin                    |
|                         | B1-Br10_E2g2         | LB-BRINE-C1970-cds5   | sensory rhodopsin                |
|                         | B1-Br10_E2g2         | LB-BRINE-C4658-cds5   | sensory rhodopsin-2              |
|                         | B1-Br10_E2g27        | LB-BRINE-C5464-cds6   | halorhodopsin                    |
|                         | PL-Br10_E2g26        | PL-BRINE-C16264-cds6  | halorhodopsin                    |
|                         | Tc-Br11_E2g1         | LTtc-BRINE-C6008-cds8 | halorhodopsin                    |
|                         | Tc-Br11_E2g14        | LTtc-BRINE-C69-cds40  | halorhodopsin                    |
|                         | Tc-Br11_E2g14        | LTtc-BRINE-C6857-cds7 | sensory rhodopsin-2              |
|                         | Tc-Br11_E2g28        | LTtc-BRINE-C2288-cds2 | halorhodopsin                    |
| Tc-Br11_E2g8            | LTtc-BRINE-C596-cds1 | halorhodopsin         |                                  |
| <i>Haloferacaceae</i>   | B1-Br10_E2g22        | LB-BRINE-C150-cds31   | sensory rhodopsin-2              |
|                         | PL-Br10_E2g46        | PL-BRINE-C5937-cds4   | sensory rhodopsin-2              |
|                         | Tc-Br11_E2g18        | LTtc-BRINE-C3325-cds9 | sensory rhodopsin-1              |
|                         | Tc-Br11_E2g18        | LTtc-BRINE-C7190-cds3 | halorhodopsin                    |
| <i>Halobacteriaceae</i> | Tc-Br11_E2g27        | LTtc-BRINE-C497-cds20 | sensory rhodopsin                |
|                         | Tc-Br11_E2g27        | LTtc-BRINE-C5242-cds3 | sensory rhodopsin-2              |

**Supplementary Table 10. Detected marker genes involved in carbon (C), nitrogen (N) and sulfur (S) metabolism from selected *Halobacteria*-related draft genomes from a selection of draft genomes.** Marker genes were selected according to Lauro *et al.* (2011) and Llorens-Marès *et al.* (2015). *Haloferacaceae*-, *Halobacteriaceae*- and *Natrialbaceae*-related draft genomes are marked in light grey, light blue and light pink respectively.

|                                       | Functional process             | Knumber                                                     | Marker gene                                           | Tc-Br11_E2g27 | B1-Br10_E2g22 | PL-Br10_E2g29 | PL-Br10_E2g46 | PL-Br10_E2g5 | Tc-Br11_E2g18 | B1-Br10_E2g27 | B1-Br10_E2g2 | PL-Br10_E2g26 | Tc-Br11_E2g14 | Tc-Br11_E2g1 | Tc-Br11_E2g28 | Tc-Br11_E2g8 |   |
|---------------------------------------|--------------------------------|-------------------------------------------------------------|-------------------------------------------------------|---------------|---------------|---------------|---------------|--------------|---------------|---------------|--------------|---------------|---------------|--------------|---------------|--------------|---|
| C                                     | Anaerobic carbon fixation      | K00174                                                      | 2-oxoglutarate:ferredoxin oxidorecutase subunit alpha | +             | +             | +             | +             | +            | +             |               | +            | +             | +             | +            | +             | +            |   |
|                                       |                                | K00175                                                      | 2-oxoglutarate:ferredoxin oxidoreductase subunit beta | +             | +             | +             | +             | +            | +             | +             | +            | +             | +             | +            | +             | +            | + |
|                                       |                                | K00244                                                      | fumarate reductase flavoprotein subunit               | +             |               |               |               |              |               |               |              |               |               |              | +             |              |   |
|                                       | Fermentation                   | K00016                                                      | L-lactate dehydrogenase                               | +             | +             |               |               |              | +             | +             | +            | +             | +             | +            | +             | +            | + |
|                                       | Aerobic respiration            | K02274                                                      | cytochrome c oxidase subunit I (coxa)                 | +             | +             |               | +             |              |               | +             | +            | +             | +             | +            | +             | +            | + |
|                                       |                                | K02276                                                      | cytochrome c oxidase subunit III (cox3)               |               | +             | +             |               |              |               |               |              |               | +             |              |               | +            |   |
|                                       | CO oxidation                   | K03518                                                      | CO dehydrogenase small subunit (coxS)                 |               |               |               |               |              |               |               |              |               |               |              | +             |              |   |
| K03519                                |                                | CO dehydrogenase medium subunit (coxM)                      |                                                       |               |               |               |               |              |               |               |              |               |               | +            |               |              |   |
| K03520                                |                                | CO dehydrogenase large subunit (coxL)                       |                                                       |               |               |               |               |              |               |               |              |               |               |              | +             |              |   |
| N                                     | Nitrogen assimilation          | K01915                                                      | glutamine syntetase (glnA)                            | +             | +             | +             |               |              | +             | +             |              |               | +             | +            | +             | +            |   |
|                                       |                                | K00265                                                      | glutamate synthase (NADPH/NADH) large chain (gltB)    | +             | +             |               |               |              |               |               | +            | +             | +             | +            |               |              | + |
|                                       | Mineralization                 | K00260                                                      | glutamate dehydrogenase                               |               |               |               |               |              |               |               |              |               |               |              |               |              | + |
|                                       |                                | K00261                                                      | glutamate dehydrogenase                               |               |               |               |               |              |               |               |              | +             |               |              | +             |              |   |
|                                       |                                | K00262                                                      | glutamate dehydrogenase                               | +             | +             |               |               |              | +             | +             | +            | +             | +             | +            | +             | +            | + |
| Nitrate reduction + nitrite oxidation | K00371                         | nitrate reductase beta & nitrite oxidoreductase (narH/nxrB) |                                                       |               |               |               |               | +            |               |               |              |               |               |              |               |              |   |
| S                                     | Assimilatory sulfate reduction | K00957                                                      | sulfate adenylyltransferase subunit 2 (cysD)          |               |               |               |               |              | +             |               | +            |               | +             |              | +             | +            |   |
|                                       | Mineralization                 | K01011                                                      | 3-mercaptopyruvate sulfurtransferase                  | +             | +             |               | +             |              |               | +             |              |               | +             | +            |               | +            |   |
|                                       | Polysulfide reduction          | K08352                                                      | polysulfide reductase chain A (psrA)                  |               | +             |               |               | +            |               | +             |              |               | +             | +            |               |              |   |

**Supplementary Table 11. Putative glucoside hydrolases (GHs) identified in the gene repertoire from *Halobacteria*-related draft genomes.** Predicted protein sequences were selected by sequence based annotation and Pfam rule based annotation using the CAZymes Analysis Toolkit (CAT; E-value 0.001, Bit-score 55). Unless the Contig-ID is marked with an asterix (\*), query and subject sequences had a consistent length and Pfam domain(s). Query Pfam domains and subject GenBank sequence identifiers (GI), as well as putative gene products of the besthits (Blast-N against; all e-values < 1E-05) and COG identifiers are given. CAZy families likely involved in polysaccharide degradation include chitinases (light green), cellulases and related glucanases (yellow), hemicellulases and related enzymes (dark red), glucoamylases and related GHs (orange). GH families likely involved in the hydrolysis of mono- and disaccharides are marked blue. Results classified under CAZy families GH 109 and GH 93 (encoding putative oxidoreductases and transcriptional regulators) respectively are not shown. <sup>1</sup>some enzymes belonging to this family might hydrolyse hemicellulose (e.g. xylanases), mono- or disaccharides. *Haloferacaceae*-, *Halobacteriaceae*- and *Natrialbaceae*-related draft genomes are marked in light grey, light blue and light pink respectively.

| Draft                 | ContigID-cds#        | Putative Gene product      | COG                                              | Query-Pfam domains                     | Subject GI | CAZy Family |
|-----------------------|----------------------|----------------------------|--------------------------------------------------|----------------------------------------|------------|-------------|
| PL-<br>Br10_<br>E2g46 | PL-BRINE-C7746-cds1  | alpha amylase              |                                                  | Alpha-amylase                          | ADE04704.1 | GH13        |
|                       | PL-BRINE-C7746-cds2  | glucoamylase related GH    |                                                  | Glucodextran_N Glyco_hydro_15          | AFK19507.1 | GH15        |
| B1-Br10_E2g22         | LB-BRINE-C1345-cds8  | hypothetical protein       |                                                  |                                        | ACM56147.1 | GH15        |
|                       | LB-BRINE-C1345-cds9  | GH                         |                                                  | Alpha-amylase                          | ADE03517.1 | GH13        |
|                       | LB-BRINE-C1416-cds3  | GH family 15               | SGA1 COG3387 612<br>Glucoamylase and related GHs | Glyco_hydro_15                         | AFZ73398.1 | GH15        |
|                       | LB-BRINE-C48-cds22   | 4-alpha-glucanotransferase | MalQ COG1640 520 4-alpha-glucanotransferase      | Glyco_hydro_77                         | ADQ67101.1 | GH77        |
|                       | LB-BRINE-C72-cds35   | glucoamylase related GH    |                                                  | Glucodextran_N Glyco_hydro_15          | AFK19507.1 | GH15        |
|                       | LB-BRINE-C72-cds36   | alpha amylase              |                                                  | Alpha-amylase                          | ADE04704.1 | GH13        |
|                       | LB-BRINE-C792-cds10  | GH                         | AmyA COG0366 505 GHs                             | Alpha-amylase                          | AFK18760.1 | GH13        |
| PL-<br>Br10_E2g29     | PL-BRINE-C7110-cds5  | hypothetical protein       |                                                  | Glyco_hydro_3 Glyco_hydro_3_C Fn3-like | AGB37354.1 | GH3         |
|                       | PL-BRINE-C11462-cds3 | glucoamylase related GH    |                                                  |                                        | ABU58666.1 | GH15        |
|                       | PL-BRINE-C2927-cds3  | GH                         | AmyA COG0366 505 GHs                             | Alpha-amylase                          | AFK18760.1 | GH13        |
|                       | PL-BRINE-C7633-cds4  | 4-alpha-glucanotransferase | MalQ COG1640 520 4-alpha-glucanotransferase      | Glyco_hydro_77                         | ADQ67101.1 | GH77        |

| Draft         | ContigID-cds#          | Putative Gene product       | COG                                              | Query-Pfam domains            | Subject GI | CAZy Family       |
|---------------|------------------------|-----------------------------|--------------------------------------------------|-------------------------------|------------|-------------------|
| PL-Br10_E2g5  | PL-BRINE-C3624-cds5    | GH family 68                |                                                  | Glyco_hydro_68                | ACM58061.1 | GH68              |
| Tc-Br11_E2g18 | LTtc-BRINE-C3859-cds7  | hypothetical protein        |                                                  | DUF4157                       | AFZ68540.1 | GH19              |
|               | LTtc-BRINE-C1915-cds10 | glucan 14-alpha-glucosidase |                                                  |                               | ACM56147.1 | GH15              |
|               | LTtc-BRINE-C2405-cds4  | 4-alpha-glucanotransferase  | MalQ COG1640 520 4-alpha-glucanotransferase      | Glyco_hydro_77                | ACM57093.1 | GH77              |
|               | LTtc-BRINE-C3355-cds9  | Levansucrase                |                                                  | Glyco_hydro_68                | ACV48051.1 | GH68              |
| B1-Br10_E2g27 | LB-BRINE-C948-cds17*   | Chitinase                   |                                                  | CBM_5_12 Glyco_hydro_18       | ADB61056.1 | GH18              |
|               | LB-BRINE-C859-cds10    | hypothetical protein        |                                                  |                               | AGF58675.1 | GH51 <sup>1</sup> |
|               | LB-BRINE-C5385-cds6    | alpha-D-1,4-glucosidase     |                                                  | Alpha-amylase                 | ACV11235.1 | GH13              |
|               | LB-BRINE-C7011-cds1    | glucoamylase                |                                                  | Glucodextran_N Glyco_hydro_15 | AAV46829.1 | GH15              |
|               | LB-BRINE-C7011-cds3    | 4-alpha-glucanotransferase  | MalQ COG1640 520 4-alpha-glucanotransferase      | Glyco_hydro_77                | ACV11232.1 | GH77              |
| B1-Br10_E2g2  | LB-BRINE-C1245-cds16   | GH family 15                | SGA1 COG3387 612<br>Glucoamylase and related GHs | Glyco_hydro_15                | AFZ73398.1 | GH15              |
| Tc-Br11_E2g1  | LTtc-BRINE-C1785-cds15 | GH family 2                 |                                                  |                               | AFZ71909.1 | GH2               |
| Tc-Br11_E2g14 | LTtc-BRINE-C909-cds8   | hypothetical protein        |                                                  |                               | BAM03099.1 | GH74 <sup>1</sup> |
|               | LTtc-BRINE-C1440-cds11 | glucan 14-alpha-glucosidase |                                                  |                               | AEM58374.1 | GH15              |
|               | LTtc-BRINE-C5756-cds2  | GH family 15                | SGA1 COG3387 612<br>Glucoamylase and related GHs | Glyco_hydro_15                | AGB38313.1 | GH15              |
|               | LTtc-BRINE-C62-cds4    | cyclomaltodextrinase        | AmyA COG0366 505 GHs                             | Alpha-amylase_N Alpha-amylase | AEH38729.1 | GH13 CBM34        |
|               | LTtc-BRINE-C9-cds29    | GH family 81                | ACF2 COG5498 760 Predicted GH                    | Glyco_hydro_81                | AEH38967.1 | GH81              |

| Draft                        | ContigID-cds#          | Putative Gene product            | COG                                                                                | Query-Pfam domains                     | Subject GI | CAZy Family |
|------------------------------|------------------------|----------------------------------|------------------------------------------------------------------------------------|----------------------------------------|------------|-------------|
| Tc-Br11_E2g14<br>(continued) | LTtc-BRINE-C123-cds11  | GH                               |                                                                                    |                                        | AFZ71909.1 | GH2         |
|                              | LTtc-BRINE-C1530-cds7  | Levansucrase                     |                                                                                    | Glyco_hydro_68                         | AGB39317.1 | GH68        |
|                              | LTtc-BRINE-C44-cds28   | GH family 42                     | LacA COG1874 673 Beta-galactosidase                                                | Glyco_hydro_42 Glyco_hydro_42M         | AGB38905.1 | GH42        |
|                              | LTtc-BRINE-C755-cds18  | alpha-galactosidase              | CelF COG1486 442 Alpha-galactosidases/6-phospho-beta-glucosidases, family 4 of GHs | Glyco_hydro_4 Glyco_hydro_4C           | AEH38218.1 | GH4         |
| Tc-Br11_E2g28                | LTtc-BRINE-C4350-cds3* | GH family 3                      |                                                                                    | Glyco_hydro_3 Glyco_hydro_3_C Fn3-like | ADQ68885.1 | GH3         |
|                              | LTtc-BRINE-C1834-cds10 | alpha-galactosidase              |                                                                                    | Glyco_hydro_31                         | ACM58429.1 | GH36        |
|                              | LTtc-BRINE-C653-cds2   | glucan 1 4-alpha-glucosidase /GH |                                                                                    |                                        | AAV47172.1 | GH15        |
|                              | LTtc-BRINE-C653-cds7   | cyclomaltodextrinase             | AmyA COG0366 505 GHs                                                               | Alpha-amylase_N Alpha-amylase          | AEH38729.1 | GH13 CBM34  |
|                              | LTtc-BRINE-C1834-cds9  | beta-galactosidase               | LacA COG1874 673 Beta-galactosidase                                                | Glyco_hydro_42 Glyco_hydro_42M         | AGB38905.1 | GH42        |
|                              | LTtc-BRINE-C3276-cds1  | Levansucrase                     |                                                                                    | Glyco_hydro_68                         | AGB39317.1 | GH68        |
|                              | LTtc-BRINE-C352-cds15  | GH                               |                                                                                    |                                        | AFZ71909.1 | GH2         |
| PL-Br10_E2g26                | PL-BRINE-C17887-cds4   | GH family 15                     | SGA1 COG3387 612 Glucoamylase and related GHs                                      | Glyco_hydro_15                         | AFZ73398.1 | GH15        |
|                              | PL-BRINE-C9038-cds5    | cyclomaltodextrinase             | AmyA COG0366 505 GHs                                                               | Alpha-amylase_N Alpha-amylase          | AEH38729.1 | GH13 CBM34  |
|                              | PL-BRINE-C1577-cds16   | GH                               |                                                                                    |                                        | AFZ71909.1 | GH2         |

**Supplementary Table 12. Detected marker genes involved in carbon (C), nitrogen (N) and sulfur (S) metabolism from selected *Bacteroidetes*-related draft genomes from a selection of draft genomes.** Marker genes were selected according to Lauro *et al.* (2011) and Llorens-Marès *et al.* (2015).

|                 | <b>Functional process</b>      | <b>Knumber</b>                 | <b>Marker gene</b>                                    | <b>T5-Br10_B2g0</b> | <b>T5-Br10_B2g13</b> | <b>Tc-Br11_B2g6_7</b> |
|-----------------|--------------------------------|--------------------------------|-------------------------------------------------------|---------------------|----------------------|-----------------------|
| C               | Anaerobic carbon fixation      | K00174                         | 2-oxoglutarate:ferredoxin oxidorecutase subunit alpha |                     | +                    | +                     |
|                 |                                | K00175                         | 2-oxoglutarate:ferredoxin oxidoreductase subunit beta |                     | +                    | +                     |
|                 | Fermentation                   | K00016                         | L-lactate dehydrogenase                               |                     | +                    | +                     |
|                 | Aerobic respiration            | K02274                         | cytochrome c oxidase subunit I (coxa)                 | +                   | +                    | +                     |
|                 |                                | K02276                         | cytochrome c oxidase subunit III (coxc)               | +                   | +                    | +                     |
| N               | Nitrogen assimilation          | K01915                         | glutamine syntetase (glnA)                            |                     | +                    | +                     |
|                 | Mineralization                 | K00260                         | glutamate dehydrogenase                               |                     | +                    | +                     |
|                 |                                | K00261                         | glutamate dehydrogenase                               |                     | +                    | +                     |
|                 |                                | K00262                         | glutamate dehydrogenase                               |                     | +                    | +                     |
| Denitrification | K00376                         | nitrous oxide reductase (nosZ) |                                                       | +                   |                      |                       |
| S               | Assimilatory sulfate reduction | K00957                         | sulfate adenyltransferase subunit 2 (cysD)            |                     | +                    |                       |
|                 | Mineralization                 | K01011                         | 3-mercaptopyruvate sulfurtransferase                  |                     | +                    |                       |

**Supplementary Table 13. Putative glucoside hydrolases (GHs) identified in the gene repertoire from *Bacteroidetes*-related draft genomes.** Predicted protein sequences were selected by sequence based annotation and Pfam rule based annotation using the CAZymes Analysis Toolkit (CAT; E-value 0.001, Bit-score 55). Query sequences were retained only if both their length and Pfam domains were consistent with the subject. Query Pfam domains and subject GenBank sequence identifiers (GI), as well as putative gene products of the besthits (Blast-N against; all e-values < 1E-05) and COG identifiers are given. CAZy families likely involved in polysaccharide degradation include chitinases (light green), cellulases and related glucanases (yellow), hemicellulases and related enzymes (dark red), enzymes acting on pectic polysaccharides (grey), glucoamylases and related GHs (orange). GH families likely involved in the hydrolysis of mono- and disaccharides are marked blue. Results classified under CAZy families GH 109 and GH 128 (encoding putative oxidoreductases and a RNA polymerase) respectively are not shown.

| Draft                                           | ContigID-cds#         | Putative Gene product        | COG                                                                                                  | Pfam domains                           | Subject GI | CAZy Family |
|-------------------------------------------------|-----------------------|------------------------------|------------------------------------------------------------------------------------------------------|----------------------------------------|------------|-------------|
| <i>Chitinophagaceae bacterium T5-Br10_B2g13</i> | LT5-BRINE-C157-cds14  | hypothetical protein         | COG4623 473 Predicted soluble lytic transglycosylase fused to an ABC-type amino acid-binding protein | SBP_bac_3 SLT                          | AFU70457.1 | GH23        |
|                                                 | LT5-BRINE-C7091-cds7  | hypothetical protein         |                                                                                                      |                                        | AFJ21509.1 | GH23        |
|                                                 | LT5-BRINE-C8698-cds6  | hypothetical protein         |                                                                                                      |                                        | AFJ21509.1 | GH23        |
|                                                 | LT5-BRINE-C9827-cds10 | hypothetical protein         |                                                                                                      | Peptidase_M23                          | ABJ68049.1 | GH23        |
|                                                 | LT5-BRINE-C1119-cds5  | hypothetical protein         |                                                                                                      |                                        | AFN74880.1 | GH51        |
|                                                 | LT5-BRINE-C1965-cds2  | hypothetical protein         |                                                                                                      | DUF2233                                | AFN74880.1 | GH51        |
|                                                 | LT5-BRINE-C1965-cds5  | hypothetical protein partial |                                                                                                      | DUF187                                 | AFN74880.1 | GH51        |
|                                                 | LT5-BRINE-C2171-cds4  | hypothetical protein         |                                                                                                      | Glyco_hydro_3 Glyco_hydro_3_C Fn3-like | AFH50282.1 | GH3         |
|                                                 | LT5-BRINE-C225-cds24  | hypothetical protein         |                                                                                                      |                                        | AFN74880.1 | GH51        |
|                                                 | LT5-BRINE-C3721-cds4  | beta-glucosidase-like GH     |                                                                                                      | Glyco_hydro_3 Glyco_hydro_3_C Fn3-like | AFD06687.1 | GH3         |
|                                                 | LT5-BRINE-C6919-cds3  | GH family 3                  | BglX COG1472 397 Beta-glucosidase-related GHs                                                        | Glyco_hydro_3                          | ACF12716.1 | GH3         |
|                                                 | LT5-BRINE-C84-cds10   | hypothetical protein         |                                                                                                      |                                        | AGC77489.1 | GH17        |
|                                                 | LT5-BRINE-C84-cds13   | hypothetical protein         | COG5309 305 Exo-beta-1,3-glucanase                                                                   |                                        | AFU69871.1 | GH17        |
|                                                 | LT5-BRINE-C84-cds14   | GH, partial                  |                                                                                                      |                                        | ACA88632.1 | GH17        |
|                                                 | LT5-BRINE-C84-cds8    | hypothetical protein         | SKN1 COG2273 355 Beta-glucanase/Beta-glucan synthetase                                               | Glyco_hydro_16                         | AGC77483.1 | GH16        |

| Draft                                                       | ContigID-cds#        | Putative Gene product                     | COG                                                    | Pfam domains                                                       | Subject GI                               | CAZy Family |
|-------------------------------------------------------------|----------------------|-------------------------------------------|--------------------------------------------------------|--------------------------------------------------------------------|------------------------------------------|-------------|
| <i>Chitinophagaceae</i> bacterium T5-Br10_B2g13 (continued) | LT5-BRINE-C898-cds25 | hypothetical protein<br>AAW51_1390        |                                                        | Glyco_hydro_81                                                     | BAG20040.1                               | GH81        |
|                                                             | LT5-BRINE-C3110-cds1 | ABC transporter substrate-binding protein | XynB COG3507 549 Beta-xylosidase                       | Glyco_hydro_43                                                     | AEN72423.1                               | GH43        |
|                                                             | LT5-BRINE-C84-cds11  | hypothetical protein                      | COG5520 433 O-Glycosyl hydrolase                       | Glyco_hydro_30                                                     | EAQ41139.2                               | GH30        |
|                                                             | LT5-BRINE-C2755-cds8 | hypothetical protein                      |                                                        |                                                                    | AFN74218.1                               | GH105       |
|                                                             | LT5-BRINE-C179-cds17 | 4-alpha-glucanotransferase                | MalQ COG1640 520 4-alpha-glucanotransferase            | Glyco_hydro_77                                                     | AFZ29826.1                               | GH77        |
|                                                             | LT5-BRINE-C185-cds22 | hypothetical protein                      |                                                        | Alpha-amylase                                                      | AFN75430.1                               | GH13        |
|                                                             | LT5-BRINE-C18-cds4   | glycosyltransferase 36                    |                                                        | Glycoamylase Glyco_transf_36 GT36_AF CBM_X Glyco_transf_36 GT36_AF | ADH61505.1                               | GH94 GT84   |
|                                                             | LT5-BRINE-C2171-cds7 | alpha amylase catalytic subunit           |                                                        | Alpha-amylase                                                      | AGC76529.1                               | GH13        |
|                                                             | LT5-BRINE-C2182-cds4 | alpha-amylase                             |                                                        | Alpha-amylase                                                      | AEE23801.1                               | GH13        |
|                                                             | LT5-BRINE-C366-cds5  | hypothetical protein                      | AmyA COG0366 505 GHs                                   | Cyc-maltodext_N Alpha-amylase Cyc-maltodext_C                      | ADV49822.1                               | GH13        |
|                                                             | LT5-BRINE-C6751-cds4 | hypothetical protein                      |                                                        |                                                                    | CBL12378.1                               | GH1         |
|                                                             | LT5-BRINE-C691-cds6  | hypothetical protein                      | LacZ COG3250 808 Beta-galactosidase/beta-glucuronidase | Glyco_hydro_2_N Glyco_hydro_2 Glyco_hydro_2_C Bgal_small_N         | ABJ85566.1                               | GH2         |
|                                                             | LT5-BRINE-C7036-cds3 | alpha-mannosidase                         | COG3537 768 Putative alpha-1,2-mannosidase             | Glyco_hydro_92                                                     | CBW20954.1<br>/CAH06071.1<br>/BAD47099.1 | GH92        |
|                                                             | LT5-BRINE-C418-cds24 | trehalase tre37A                          | TreA COG1626 558 Neutral trehalase                     | Trehalase                                                          | ABS77572.1                               | GH37        |
|                                                             | LT5-BRINE-C674-cds1  | glucuronyl hydrolase                      |                                                        | Glyco_hydro_88                                                     | ADY51417.1                               | GH88        |



| Draft                                           | ContigID-cds#         | Putative Gene product                                    | COG                                                                                                  | Pfam domains                                               | Subject GI            | CAZy Family |
|-------------------------------------------------|-----------------------|----------------------------------------------------------|------------------------------------------------------------------------------------------------------|------------------------------------------------------------|-----------------------|-------------|
| <i>Flavobacteriaceae</i> bacterium T5-Br10_B2g0 | LT5-BRINE-C1669-cds7  | lytic transglycosylase                                   |                                                                                                      | SBP_bac_3 SLT                                              | AFU70457.1            | GH23        |
|                                                 | LT5-BRINE-C5692-cds7  | murein transglycosylase                                  |                                                                                                      | SLT                                                        | AFU70471.1            | GH23        |
|                                                 | LT5-BRINE-C18102-cds1 | hypothetical protein                                     | LacZ COG3250 808 Beta-galactosidase/beta-glucuronidase                                               | Glyco_hydro_16                                             | AFU70112.1            | GH16        |
|                                                 | LT5-BRINE-C551-cds18  | beta-N-acetylglucosaminidase                             |                                                                                                      | Glyco_hydro_3 Beta-lactamase                               | AFU70238.1            | GH3         |
|                                                 | LT5-BRINE-C6872-cds4  | GH                                                       | COG4623 473 Predicted soluble lytic transglycosylase fused to an ABC-type amino acid-binding protein | Glyco_hydro_15                                             | AFU68072.1            | GH15        |
|                                                 | LT5-BRINE-C918-cds1   | hypothetical protein                                     |                                                                                                      | Glyco_hydro_2_N Glyco_hydro_2 Glyco_hydro_2_C Bgal_small_N | ABG39349.1/AEE24439.1 | GH2         |
|                                                 | LT5-BRINE-C930-cds10  | GH                                                       | SGA1 COG3387 612 Glucoamylase and related GHs                                                        | Glyco_hydro_2_N Glyco_hydro_2 Glyco_hydro_2_C              | CAZ97771.1            | GH2         |
| <i>Rhodothermaceae</i> bacterium Tc-Br11_B2g6_7 | LTtc-BRINE-C22-cds36  | GH family 3, partial                                     |                                                                                                      | Glyco_hydro_3 Glyco_hydro_3_C Fn3-like                     | CBH25982.1            | GH3         |
|                                                 | LTtc-BRINE-C247-cds20 | hypothetical protein partial                             |                                                                                                      | Glyco_hydro_3                                              | AFY75765.1            | GH3         |
|                                                 | LTtc-BRINE-C667-cds2  | hypothetical protein                                     |                                                                                                      |                                                            | AFN74927.1            | GH5 CBM35   |
|                                                 | LTtc-BRINE-C48-cds44  | hypothetical protein                                     |                                                                                                      | GTA_TIM                                                    | ABC45350.1            | GH113       |
|                                                 | LTtc-BRINE-C130-cds11 | glycosyl hydrolase family 15                             | SGA1 COG3387 612 Glucoamylase and related GHs                                                        | Glyco_hydro_15                                             | ACV68191.1            | GH15        |
|                                                 | LTtc-BRINE-C2009-cds2 | hypothetical protein                                     | AmyA COG0366 505 GHs                                                                                 | Alpha-amylase                                              | AFL85845.1            | GH13        |
|                                                 | LTtc-BRINE-C3-cds14   | 4-alpha-glucanotransferase                               | MalQ COG1640 520 4-alpha-glucanotransferase                                                          | Glyco_hydro_77                                             | ACY47896.1            | GH77        |
|                                                 | LTtc-BRINE-C3-cds7    | trehalose synthase                                       |                                                                                                      | Alpha-amylase                                              | ABY34390.1/ACM52692.1 | GH13        |
|                                                 | LTtc-BRINE-C3-cds8    | alpha-1,4-glucan:maltose-1-phosphate maltosyltransferase |                                                                                                      | DUF3416                                                    | ADJ29108.1            | GH13        |
|                                                 | LTtc-BRINE-C48-cds20  | alpha-amylase                                            |                                                                                                      | Alpha-amylase                                              | AEN73683.1            | GH13        |
|                                                 | LTtc-BRINE-C48-cds6   | fructofuranosidase/invertase                             |                                                                                                      | n/a                                                        | AGA90774.1            | GH100       |
